# Supplementary material
Source: PubMed Central journal article supplement (PMC8096643)
Supplement: NIHMS1640743-supplement-1.pdf [file NIHMS1640743-supplement-1.pdf]

**Supplementary Table S1. Characteristics of the 60 controls with chest CTs compared to the 173 controls without**

| Characteristic                     | Number (%)     |                    | p-value |
|------------------------------------|----------------|--------------------|---------|
|                                    | With CT (N=60) | Without CT (N=173) |         |
| Years to Index Date, median (IQR)  | 1.2 (-2.8,5.3) | 2.2 (-1.2,5.7)     | 0.41    |
| Age in years, mean (SD)            | 66 (11)        | 65 (11)            | 0.44    |
| Female Sex                         | 54 (90)        | 132 (76)           | 0.02    |
| RA Duration in years, mean (SD)    | 21 (11)        | 20 (12)            | 0.45    |
| RF Positive                        | 52 (87)        | 143 (83)           | 0.47    |
| CCP Positive                       | 49 (82)        | 141 (82)           | 0.98    |
| White, non-Hispanic                | 53 (88)        | 166 (96)           | 0.03    |
| Education Less than College        | 29 (48)        | 69 (40)            | 0.25    |
| Joint Erosions                     | 38 (63)        | 67 (61)            | 0.78    |
| Rheumatoid Nodules                 | 22 (37)        | 58 (34)            | 0.66    |
| Body Mass Index, kg/m <sup>2</sup> |                |                    | 0.90    |
| <20                                | 3 (5)          | 13 (8)             |         |
| 20-<25                             | 20 (33)        | 57 (33)            |         |
| 25-<30                             | 22 (37)        | 65 (38)            |         |
| ≥30                                | 15 (25)        | 38 (22)            |         |
| Smoking Status                     |                |                    | 0.42    |
| Never                              | 30 (50)        | 94 (54)            |         |
| Past                               | 29 (48)        | 71 (41)            |         |
| Current                            | 1 (2)          | 8 (5)              |         |
| Smoking Pack-Years                 |                |                    | 0.33    |
| Never Smoker                       | 30 (50)        | 96 (55)            |         |
| 1-9                                | 14 (23)        | 31 (18)            |         |
| 10-19                              | 10 (17)        | 18 (10)            |         |

|                               |         |          |      |
|-------------------------------|---------|----------|------|
| 20-29                         | 5 (8)   | 16 (9)   |      |
| ≥30                           | 1 (2)   | 12 (7)   |      |
| C-Reactive Protein, mg/L      |         |          | 0.92 |
| Normal (<3)                   | 36 (60) | 100 (58) |      |
| Low-Positive (3-<10)          | 16 (27) | 51 (29)  |      |
| High-Positive (≥10)           | 8 (13)  | 22 (13)  |      |
| Disease Activity Score-28-CRP |         |          | 0.82 |
| Remission (<2.6)              | 27 (45) | 77 (45)  |      |
| Low (2.6-<3.2)                | 12 (20) | 27 (16)  |      |
| Moderate (3.2-<5.1)           | 17 (28) | 53 (31)  |      |
| High (≥5.1)                   | 4 (7)   | 16 (9)   |      |
| MDHAQ Score                   |         |          | 0.28 |
| 0-<0.2                        | 13 (22) | 51 (29)  |      |
| 0.2-<1.0                      | 38 (63) | 89 (51)  |      |
| ≥1.0                          | 9 (15)  | 33 (19)  |      |
| Biologic DMARD Use            |         |          | 0.26 |
| Never                         | 16 (27) | 60 (35)  |      |
| Past                          | 10 (17) | 17 (10)  |      |
| Current                       | 34 (57) | 96 (55)  |      |
| Methotrexate Use              |         |          | 0.95 |
| Never                         | 6 (10)  | 18 (10)  |      |
| Past                          | 25 (42) | 68 (39)  |      |
| Current                       | 29 (48) | 87 (50)  |      |
| Prednisone Use                |         |          | 0.11 |
| Never                         | 6 (10)  | 25 (14)  |      |
| Past                          | 32 (53) | 108 (62) |      |
| Current                       | 22 (37) | 40 (23)  |      |

---

CRP = C-reactive protein, CT = computed tomography, DMARD = disease-modifying anti-rheumatic

drug, ILD = interstitial lung disease, IQR = interquartile range, MDHAQ = multi-dimensional health assessment questionnaire, RA = rheumatoid arthritis, RF = rheumatoid factor, SD = standard deviation

STROBE Statement—Checklist of items that should be included in reports of *case-control studies*

|                              | Item No | Recommendation                                                                                                                                                                                    | Page No |
|------------------------------|---------|---------------------------------------------------------------------------------------------------------------------------------------------------------------------------------------------------|---------|
| <b>Title and abstract</b>    | 1       | (a) Indicate the study's design with a commonly used term in the title or the abstract                                                                                                            | 2       |
|                              |         | (b) Provide in the abstract an informative and balanced summary of what was done and what was found                                                                                               | 2       |
| <b>Introduction</b>          |         |                                                                                                                                                                                                   |         |
| Background/rationale         | 2       | Explain the scientific background and rationale for the investigation being reported                                                                                                              | 4       |
| Objectives                   | 3       | State specific objectives, including any prespecified hypotheses                                                                                                                                  | 4-5     |
| <b>Methods</b>               |         |                                                                                                                                                                                                   |         |
| Study design                 | 4       | Present key elements of study design early in the paper                                                                                                                                           | 5-6     |
| Setting                      | 5       | Describe the setting, locations, and relevant dates, including periods of recruitment, exposure, follow-up, and data collection                                                                   | 5-6     |
| Participants                 | 6       | (a) Give the eligibility criteria, and the sources and methods of case ascertainment and control selection. Give the rationale for the choice of cases and controls                               | 6       |
|                              |         | (b) For matched studies, give matching criteria and the number of controls per case                                                                                                               | 6       |
| Variables                    | 7       | Clearly define all outcomes, exposures, predictors, potential confounders, and effect modifiers. Give diagnostic criteria, if applicable                                                          | 6-7     |
| Data sources/<br>measurement | 8*      | For each variable of interest, give sources of data and details of methods of assessment (measurement). Describe comparability of assessment methods if there is more than one group              | 6-7     |
| Bias                         | 9       | Describe any efforts to address potential sources of bias                                                                                                                                         | 6,7,17  |
| Study size                   | 10      | Explain how the study size was arrived at                                                                                                                                                         | 7       |
| Quantitative variables       | 11      | Explain how quantitative variables were handled in the analyses. If applicable, describe which groupings were chosen and why                                                                      | 6-7     |
| Statistical methods          | 12      | (a) Describe all statistical methods, including those used to control for confounding                                                                                                             | 7       |
|                              |         | (b) Describe any methods used to examine subgroups and interactions                                                                                                                               | 7       |
|                              |         | (c) Explain how missing data were addressed                                                                                                                                                       | 7       |
|                              |         | (d) If applicable, explain how matching of cases and controls was addressed                                                                                                                       | 6       |
|                              |         | (e) Describe any sensitivity analyses                                                                                                                                                             | 7       |
| <b>Results</b>               |         |                                                                                                                                                                                                   |         |
| Participants                 | 13*     | (a) Report numbers of individuals at each stage of study—eg numbers potentially eligible, examined for eligibility, confirmed eligible, included in the study, completing follow-up, and analysed | 7       |
|                              |         | (b) Give reasons for non-participation at each stage                                                                                                                                              | N/A     |
|                              |         | (c) Consider use of a flow diagram                                                                                                                                                                | N/A     |
| Descriptive data             | 14*     | (a) Give characteristics of study participants (eg demographic, clinical, social) and information on exposures and potential confounders                                                          | Table 1 |
|                              |         | (b) Indicate number of participants with missing data for each variable of interest                                                                                                               | 7       |
| Outcome data                 | 15*     | Report numbers in each exposure category, or summary measures of exposure                                                                                                                         | Table 1 |

|                          |    |                                                                                                                                                                                                              |               |
|--------------------------|----|--------------------------------------------------------------------------------------------------------------------------------------------------------------------------------------------------------------|---------------|
| Main results             | 16 | (a) Give unadjusted estimates and, if applicable, confounder-adjusted estimates and their precision (eg, 95% confidence interval). Make clear which confounders were adjusted for and why they were included | Tables 1-4, 7 |
|                          |    | (b) Report category boundaries when continuous variables were categorized                                                                                                                                    | Table 1       |
|                          |    | (c) If relevant, consider translating estimates of relative risk into absolute risk for a meaningful time period                                                                                             | N/A           |
| Other analyses           | 17 | Report other analyses done—eg analyses of subgroups and interactions, and sensitivity analyses                                                                                                               | 12            |
| <b>Discussion</b>        |    |                                                                                                                                                                                                              |               |
| Key results              | 18 | Summarise key results with reference to study objectives                                                                                                                                                     | 14            |
| Limitations              | 19 | Discuss limitations of the study, taking into account sources of potential bias or imprecision. Discuss both direction and magnitude of any potential bias                                                   | 17            |
| Interpretation           | 20 | Give a cautious overall interpretation of results considering objectives, limitations, multiplicity of analyses, results from similar studies, and other relevant evidence                                   | 18            |
| Generalisability         | 21 | Discuss the generalisability (external validity) of the study results                                                                                                                                        | 17            |
| <b>Other information</b> |    |                                                                                                                                                                                                              |               |
| Funding                  | 22 | Give the source of funding and the role of the funders for the present study and, if applicable, for the original study on which the present article is based                                                | 18            |

\*Give information separately for cases and controls.

**Note:** An Explanation and Elaboration article discusses each checklist item and gives methodological background and published examples of transparent reporting. The STROBE checklist is best used in conjunction with this article (freely available on the Web sites of PLoS Medicine at <http://www.plosmedicine.org/>, Annals of Internal Medicine at <http://www.annals.org/>, and Epidemiology at <http://www.epidem.com/>). Information on the STROBE Initiative is available at <http://www.strobe-statement.org>.

## Analysis Plan: Investigating Risk Factors for RA-ILD

### Descriptive Statistics

- N for RA-ILD cases and controls (Note: please use mean for normal variables and median for non-normal ones)
  - Age (matched)
  - Sex (matched)
  - RA duration (matched)
  - RF positivity (matched)
  - CCP positivity (yes or no)
  - Race/ethnicity (white non-Hispanic vs other)
  - Education (lower education vs not)
  - Methotrexate use (never, past, current)
  - Prednisone (never, past, current)
  - DMARD use (never, past, current)
  - Disease activity (DAS28-CRP continuous and <2.6, 2.6-<3.2, 3.2-<5.1, ≥5.1)
  - Smoking status (never, past, current)
  - Smoking pack-years (continuous and 0, 1-9, 10-19, 20-29, or 30+)
  - Functional assessment (MD-HAQ, continuous)
  - BMI (continuous and <20, 20-<25, 25-<30, or ≥30 kg/m<sup>2</sup>)
  - CRP level (continuous and normal, low-mid positive, high positive)
  - Radiographic changes (yes or no)
  - Rheumatoid nodules (yes or no)
- Unadjusted OR (95% CI) for the above variables

**Aim 0: Confirm association of previously-shown risk factors for RA-ILD including CCP positivity, drug use, and disease activity.** We hypothesize CCP positivity, drug use, and increased disease activity will continue to be associated with increased risk of RA-ILD even after adjusting for confounders.

- Above models also adjusting for seropositivity (CCP or RF), race/ethnicity, education, BMI (continuous if linear otherwise categorical), and smoking pack-years (continuous if linear otherwise categorical)
  - Race/ethnicity (white non-Hispanic vs other)
  - Education (lower education vs not)
  - CCP positivity (yes or no)
  - Methotrexate use (never, past, current)
  - Prednisone (never, past, current)
  - DMARD use (never, past, current)
  - Disease activity (DAS28-CRP continuous and <2.6, 2.6-<3.2, 3.2-<5.1, ≥5.1)

**Aim 1: Evaluate whether a threshold effect exists for smoking on risk of RA-ILD.** We hypothesize that similar to RA, approximately 20 pack-years of smoking produces the greatest risk increase for RA-ILD.

- Above models also adjusting for seropositivity (CCP or RF), race/ethnicity, education, BMI (continuous if linear otherwise categorical)
  - Smoking status (never, past, current)
  - Smoking pack-years (restricted cubic spline if enough cases; otherwise 0, 1-9, 10-19, 20-29, or 30+)

**Aim 2: Investigate the association between novel predictors and RA-ILD including functional status, obesity, CRP level, radiographic changes, and rheumatoid nodules.** We hypothesize that functional status, obesity, CRP level, radiographic changes, and rheumatoid nodules are associated with increased risk of RA-ILD.

- Above models also adjusting for seropositivity (CCP or RF), race/ethnicity, education, BMI (continuous if linear otherwise categorical), and smoking pack-years (continuous if linear otherwise categorical)
  - Functional assessment (MD-HAQ, restricted cubic spline if enough cases; otherwise categorize)
  - BMI (<20, 20-<25, 25-<30, or ≥30 kg/m<sup>2</sup>)
  - CRP level (normal, low-mid positive, high positive)
  - Radiographic changes (yes or no)
  - Rheumatoid nodules (yes or no)

**Aim 3: Determine the degree to which known risk factors for RA-ILD can predict disease development.** We hypothesize that RA factors contribute the most to RA-ILD risk and that together, known risk factors for RA-ILD can account for 80% of disease risk (i.e. AUC of 0.8).

- Calculate AUC for demographic factors (age, sex, race/ethnicity, and education)
- Calculate AUC for lifestyle factors (BMI, smoking pack-years)
- Calculate AUC for RA factors (RA duration, RF positivity, CCP positivity, drug use, disease activity, functional assessment, CRP level, radiographic changes, rheumatoid nodules)
- Calculate AUC for demographic, lifestyle, and RA factors together
- Create ROC curve graph for the above four scenarios

#### Limitations

- AUC is higher (around 0.9) in other papers. It's likely lower here because we made controls more similar to RA-ILD cases by matching on RA duration and RF positivity.
- These analyses don't account for the time-varying nature of the covariates.
- Limitation: timing of ILD can be insidious, so predictors still might be after onset of RA-ILD symptoms. Could look at dyspnea score from BRASS.
-
